# Supplementary material for: Warmer and browner waters decrease fish biomass production
Source: PubMed Central journal article supplement (PMC6850179; doi:10.1111/gcb.14551), 2019-02-10
Supplement: GCB-25-1395-s001.pdf [file GCB-25-1395-s001.pdf]

Supporting information for the study:

## Warmer and browner waters decrease fish biomass production

Renee M. van Dorst<sup>1</sup>, Anna Gårdmark<sup>2</sup>, Richard Svanbäck<sup>3</sup>, Ulrika Beier<sup>4,5</sup>, Gesa A. Weyhenmeyer<sup>6</sup>, Magnus Huss<sup>2</sup>

1. Swedish University of Agricultural Sciences, Department of Aquatic Resources, Institute of Coastal Research, Skolgatan 6, SE-742 42 Öregrund, Sweden. Corresponding author: tel: 0046-104784176, renee.van.dorst@slu.se
2. Swedish University of Agricultural Sciences, Department of Aquatic Resources, Skolgatan 6, SE-742 42 Öregrund, Sweden
3. Department of Ecology and Genetics; Animal Ecology, Evolutionary Biology Centre, Science for Life Laboratory, Uppsala University, Norbyvägen 18d, 75236 Uppsala, Sweden
4. Swedish University of Agricultural Sciences, Department of Aquatic Resources, Institute of Freshwater Research, Stångholmsvägen 2, SE-178 93, Drottningholm, Sweden
5. Wageningen Marine Research, P.O. Box 68, 1970 AB IJmuiden, the Netherlands
6. Department of Ecology and Genetics/Limnology, Evolutionary Biology Centre, Uppsala University, Norbyvägen 18d, 75236 Uppsala, Sweden

## Supplementary methods

### Absorbance, Napierian coefficient

We calculated the Napierian coefficient ( $a_{420}$ , in  $m^{-1}$ ) from the absorbance of filtered lake water (0.45  $\mu m$  filter) at 420 nm in a 5cm cuvette ( $AbsF_{420nm/5cm}$ ) as:

$$a_{420} = (AbsF_{420nm/5cm} * \ln(10))/OL \quad (1)$$

where  $a_{420}$  is the Napierian coefficient,  $AbsF_{420nm/5cm}$  the measured absorbance of filtered water at 420 nm, and OL is the optical path-length (in m).

## Supplementary figures

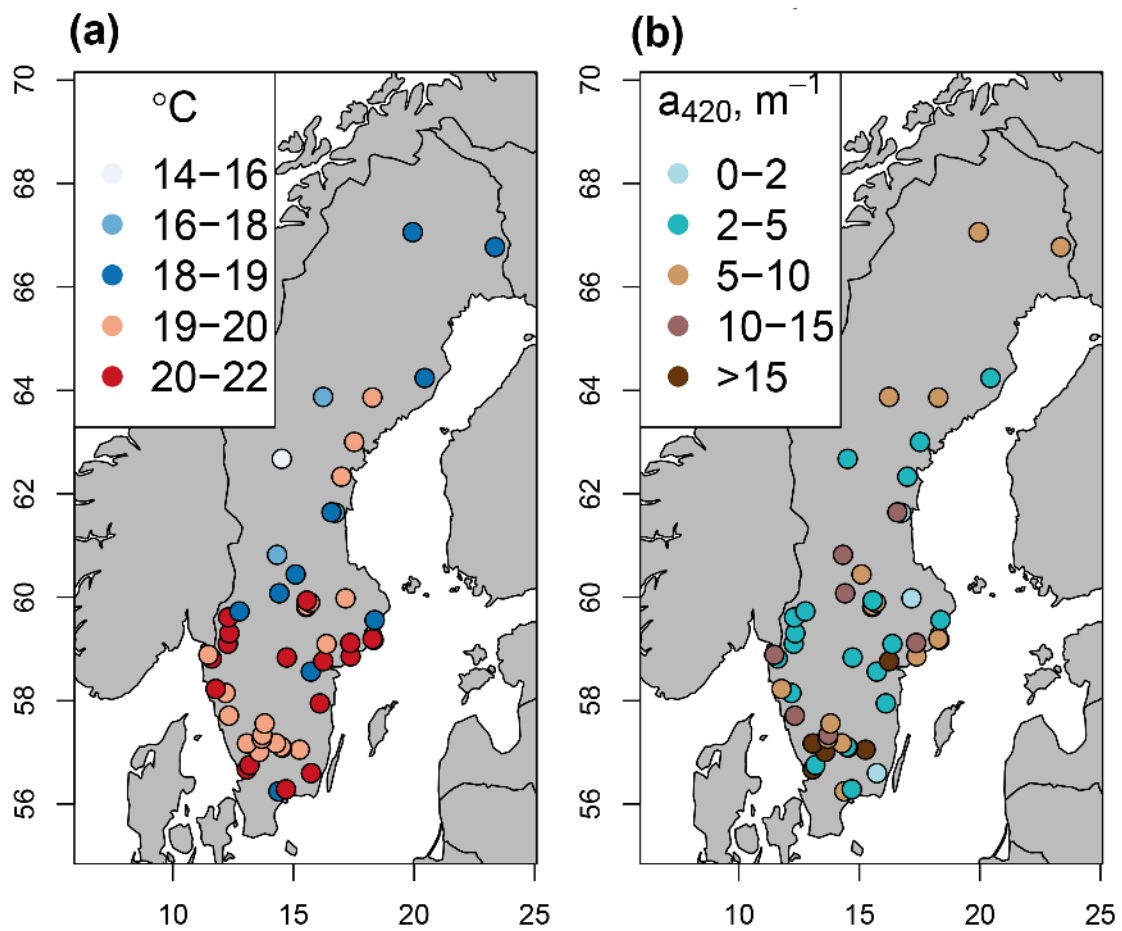

**Figure S1** Maps of the 52 Swedish temperate and boreal study lakes. **a** The water temperature and **b** the water colour (absorbance) gradient of the 52 study lakes.

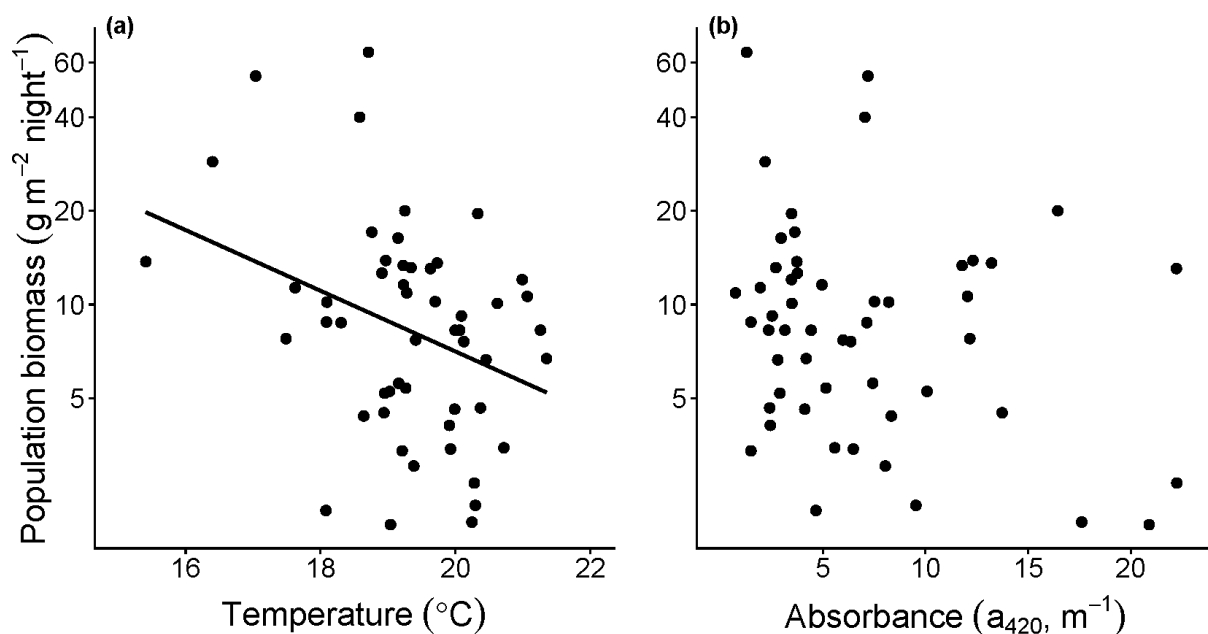

**Figure S2** Population biomass. Relationships between perch standing stock biomass and **a** temperature and **b** absorbance. Black dots represent individual lakes and the solid black regression line a significant linear relationship. See table 1 for statistical analyses.

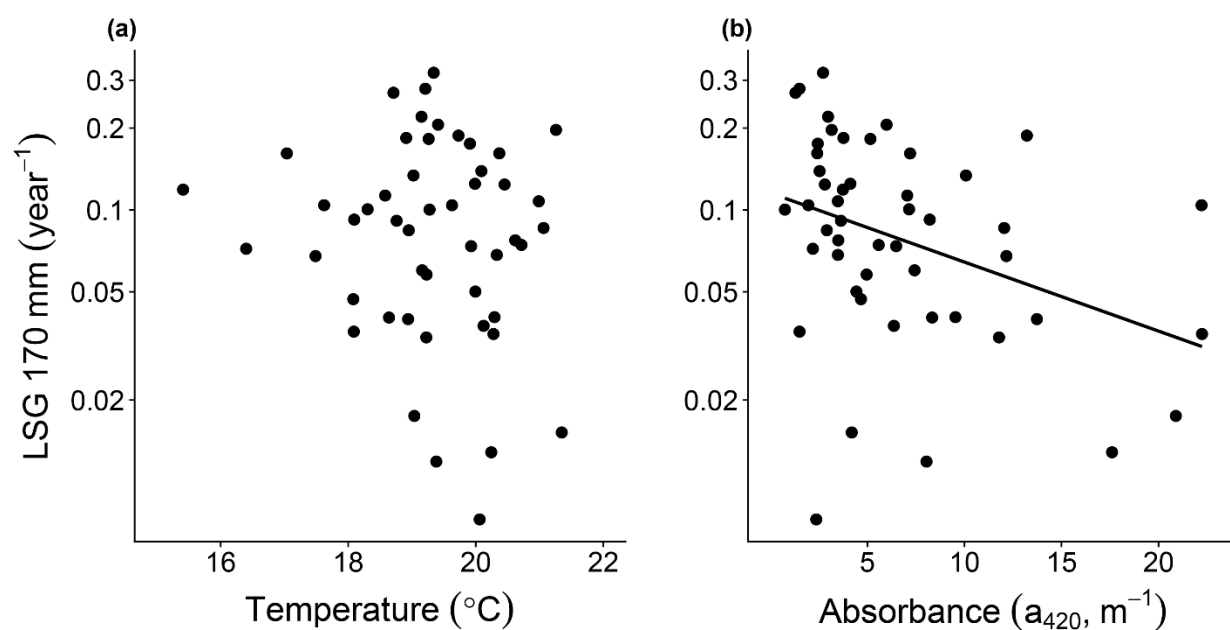

**Figure S3** Length-specific growth. Relationships between length-specific body growth (LSG,  $\text{year}^{-1}$ ) of 170 mm perch and **a** temperature and **b** absorbance. Black dots represent individual lakes and the solid black regression line a significant linear relationship. See table 1 for statistical analyses.

## Supplementary tables

**Table S1** Environmental conditions, physical characteristics and location of the 52 study lakes. Mean values of temperature (°C), absorbance ( $a_{420}$ ,  $m^{-1}$ ) and total phosphorus (P,  $\mu g/l$ ) are based on samples collected between 2006 and 2015. All lakes had benthic sampling of the fish community, part of them also had pelagic sampling (indicated by 1).

| Lake               | Latitude (WGS84) | Longitude (WGS84) | Absorbance ( $a_{420}$ ) | Temperature (°C) | P ( $\mu g/l$ ) | Mean depth (m) | Area (ha) | Pelagic sampling |
|--------------------|------------------|-------------------|--------------------------|------------------|-----------------|----------------|-----------|------------------|
| Bäen               | 56.2460          | 14.3775           | 8.34                     | 18.64            | 15.98           | 3.4            | 58        | 0                |
| Örsjön             | 56.2864          | 14.6851           | 4.19                     | 21.35            | 9.80            | 3.5            | 18        | 0                |
| Brunnsjön          | 56.5972          | 15.7281           | 22.24                    | 20.28            | 12.39           | 5.3            | 10        | 1                |
| Stora Skärsjön     | 56.6712          | 13.0658           | 2.36                     | 20.06            | 8.06            | 3.9            | 32        | 1                |
| Gyltigesjön        | 56.7532          | 13.1740           | 20.90                    | 19.04            | 15.13           | 9.1            | 40        | 1                |
| Harasjön           | 57.0074          | 13.5792           | 22.22                    | 19.63            | 30.74           | 2.3            | 61        | 0                |
| Hjärtsjön          | 57.0515          | 15.2573           | 1.29                     | 18.71            | 3.80            | 3.4            | 137       | 0                |
| Fiolen             | 57.0920          | 14.5296           | 2.97                     | 19.15            | 13.45           | 3.9            | 156       | 1                |
| Gyslättsjön        | 57.1080          | 14.4835           | 8.04                     | 19.38            | 14.45           | 2.8            | 32        | 1                |
| Älgarydssjön       | 57.1757          | 14.2727           | 16.44                    | 19.25            | 26.10           | 1.4            | 34        | 0                |
| Nässjön            | 57.1723          | 13.0674           | 6.48                     | 19.93            | 16.00           | 2.7            | 52        | 0                |
| Hagsjön            | 57.2644          | 13.6865           | 13.22                    | 19.73            | 8.50            | 4.6            | 24        | 0                |
| Hagasjön           | 57.3372          | 13.7114           | 5.99                     | 19.41            | 8.54            | 3.7            | 11        | 0                |
| Stengårdshultasjön | 57.5578          | 13.8020           | 10.08                    | 19.02            | 7.29            | 7.1            | 489       | 1                |
| Stora Härsjön      | 57.7095          | 12.3217           | 2.41                     | 20.37            | 4.14            | 14.1           | 257       | 1                |
| Allgjutten         | 57.9479          | 16.0963           | 2.44                     | 19.91            | 3.89            | 11.7           | 18        | 1                |
| Fräcksjön          | 58.1482          | 12.1812           | 5.58                     | 20.72            | 9.76            | 4.1            | 28        | 1                |
| Granvattnet        | 58.2260          | 11.7707           | 3.63                     | 18.76            | 24.42           | 1.6            | 18        | 0                |
| Geten              | 58.5610          | 15.7217           | 17.61                    | 20.24            | 20.88           | 3.6            | 20        | 0                |
| Skärgölen          | 58.7631          | 16.2339           | 2.80                     | 20.45            | 5.88            | 7              | 18        | 1                |
| Långsjön           | 58.8346          | 14.7208           | 9.53                     | 20.30            | 11.48           | 4.2            | 67        | 1                |
| Björken            | 58.8562          | 17.3702           | 3.15                     | 21.26            | 7.62            | 12.5           | 137       | 1                |
| Rotehogstjärnen    | 58.8150          | 11.6124           | 11.78                    | 19.23            | 13.58           | 3.6            | 16        | 0                |
| Ejgdesjön          | 58.8854          | 11.4709           | 2.71                     | 19.34            | 3.56            | 7              | 86        | 1                |
| Älgsjön            | 59.0949          | 16.3694           | 12.05                    | 21.06            | 27.35           | 2.5            | 36        | 0                |
| Stora Envättern    | 59.1149          | 17.3535           | 3.47                     | 20.99            | 6.89            | 5.4            | 38        | 1                |
| Västra Solsjön     | 59.1009          | 12.2763           | 1.50                     | 19.21            | 2.71            | 12.3           | 184       | 1                |
| Stensjön           | 59.1745          | 18.3244           | 4.12                     | 19.99            | 5.74            | 9.1            | 39        | 1                |
| Långsjön           | 59.1903          | 18.2969           | 6.36                     | 20.12            | 7.75            | 3.8            | 9         | 0                |
| Årsjön             | 59.1927          | 18.2781           | 3.48                     | 20.33            | 6.60            | 3.8            | 21        | 0                |
| Bysjön             | 59.3024          | 12.3399           | 2.91                     | 18.95            | 11.92           | 7.4            | 113       | 1                |
| Tärnan             | 59.5570          | 18.3660           | 3.50                     | 20.62            | 11.01           | 4.3            | 105       | 1                |
| Ulvsjön            | 59.6098          | 12.2937           | 4.67                     | 18.08            | 7.08            | 10             | 49        | 1                |
| Örvattnet          | 59.7257          | 12.7579           | 1.50                     | 18.09            | 4.53            | 9              | 80        | 1                |
| Lien               | 59.8087          | 15.5288           | 5.15                     | 19.26            | 4.00            | 7.8            | 149       | 1                |
| Övre Skärsjön      | 59.8371          | 15.5503           | 7.43                     | 19.16            | 5.84            | 6.1            | 169       | 1                |

|                        |         |         |       |       |       |     |     |   |
|------------------------|---------|---------|-------|-------|-------|-----|-----|---|
| Dagarn                 | 59.8970 | 15.6867 | 2.53  | 20.09 | 5.32  | 5.1 | 172 | 1 |
| Västra Skälsjön        | 59.9347 | 15.5529 | 0.74  | 19.28 | 3.32  | 6.6 | 43  | 1 |
| Siggeforasjön          | 59.9779 | 17.1589 | 12.31 | 18.97 | 15.06 | 4.2 | 76  | 0 |
| Skifsen                | 60.0755 | 14.4094 | 8.21  | 18.09 | 11.00 | 2.6 | 32  | 1 |
| Tryssjön               | 60.4406 | 15.0880 | 12.16 | 17.49 | 7.26  | 7.2 | 30  | 1 |
| Rädsjön                | 60.8198 | 14.3184 | 1.95  | 17.62 | 6.83  | 8.8 | 58  | 1 |
| Källsjön               | 61.6331 | 16.7354 | 13.73 | 18.94 | 9.08  | 7.1 | 24  | 1 |
| Stensjön               | 61.6428 | 16.5753 | 4.96  | 19.23 | 5.59  | 4.3 | 59  | 1 |
| Väster<br>Rännöbodsjön | 62.3301 | 16.9872 | 4.43  | 20.00 | 12.74 | 6.2 | 48  | 1 |
| Stor-Backsjön          | 62.6750 | 14.5135 | 7.20  | 17.04 | 12.21 | 2.3 | 206 | 0 |
| Valasjön               | 63.0024 | 17.5153 | 7.52  | 19.70 | 10.05 | 9   | 178 | 1 |
| Degervattnet           | 63.8728 | 16.2293 | 3.76  | 18.91 | 5.46  | 5.1 | 158 | 1 |
| Remmarsjön             | 63.8620 | 18.2726 | 7.14  | 18.31 | 8.61  | 5   | 140 | 1 |
| Bjänsjön               | 64.2389 | 20.4387 | 7.05  | 18.58 | 10.20 | 1.7 | 48  | 0 |
| Pahajärvi              | 66.7709 | 23.3529 | 2.19  | 16.40 | 11.87 | 3.9 | 132 | 1 |
| Jutsajaure             | 67.0590 | 19.9436 | 3.73  | 15.41 | 7.67  | 2.3 | 113 | 1 |

**Table S2** Fish species found in the study lakes during the sampling period. English name, latin name, the number of lakes in which the species was found, and the mean population biomass ( $\text{g}\cdot\text{m}^{-2}\cdot\text{night}^{-1}$ ) per lake in the lakes where the species occurred.

| Fish species              | Latin name                         | Number of lakes present | Mean population biomass ( $\text{g}\cdot\text{m}^{-2}\cdot\text{night}^{-1}$ ) |
|---------------------------|------------------------------------|-------------------------|--------------------------------------------------------------------------------|
| Eurasian Perch            | <i>Perca fluviatilis</i>           | 52                      | 11.48                                                                          |
| Northern pike             | <i>Esox lucius</i>                 | 47                      | 2.36                                                                           |
| Roach                     | <i>Rutilus rutilus</i>             | 42                      | 5.63                                                                           |
| Ruffe                     | <i>Gymnocephalus cernua</i>        | 23                      | 0.23                                                                           |
| Common rudd               | <i>Scardinius erythrophthalmus</i> | 13                      | 0.81                                                                           |
| Common bream              | <i>Abramis brama</i>               | 12                      | 2.03                                                                           |
| Common bleak              | <i>Alburnus alburnus</i>           | 12                      | 0.29                                                                           |
| European smelt            | <i>Osmerus eperlanus</i>           | 9                       | 0.19                                                                           |
| Burbot                    | <i>Lota lota</i>                   | 8                       | 0.48                                                                           |
| Tench                     | <i>Tinca tinca</i>                 | 7                       | 7.90                                                                           |
| Vendace                   | <i>Coregonus albula</i>            | 7                       | 1.07                                                                           |
| Brown trout               | <i>Salmo trutta</i>                | 7                       | 1.06                                                                           |
| Common whitefish          | <i>Coregonus lavaretus</i>         | 6                       | 2.19                                                                           |
| Common minnow             | <i>Phoxinus phoxinus</i>           | 4                       | 0.02                                                                           |
| European eel              | <i>Anguilla anguilla</i>           | 3                       | 0.39                                                                           |
| Arctic char               | <i>Salvelinus alpinus</i>          | 2                       | 2.61                                                                           |
| Carp species unidentified |                                    | 2                       | 0.05                                                                           |
| Ide                       | <i>Leuciscus idus</i>              | 1                       | 1.16                                                                           |
| Zander/pikeperch          | <i>Sander lucioperca</i>           | 1                       | 0.51                                                                           |
| Crucian carp              | <i>Carassius carassius</i>         | 1                       | 0.22                                                                           |
| Alpine bullhead           | <i>Cottus poecilopus</i>           | 1                       | 1.16E-03                                                                       |
| Ninespine stickleback     | <i>Pungitius pungitius</i>         | 1                       | 2.90E-04                                                                       |

**Table S3** Lake-specific coefficients for the calculations of fish biomass production, based on length-at-age relationships  $L = a * A^b$  (eq. 1), weight-at-length relationships  $W = c * L^d$  (eq. 2), and weight-at-age relationships  $W = f * A^g$  (eq. 3). Lake specific coefficients were also used for the size specific growth relationships  $G_{L,t-1,lake} = \alpha_{lake} * e^{\beta_{lake} * L_{t-1}}$  (eq. 5). Some lakes do not have all values as we did not have all data for all lakes, see methods.

| Lake               | Fish biomass production |          |          |          |          |          | Size specific growth |                |
|--------------------|-------------------------|----------|----------|----------|----------|----------|----------------------|----------------|
|                    | <i>a</i>                | <i>b</i> | <i>c</i> | <i>d</i> | <i>f</i> | <i>g</i> | $\alpha_{lake}$      | $\beta_{lake}$ |
| Bäen               | 4.212                   | 0.459    | -12.001  | 3.112    | 1.109    | 1.427    | 4.923                | -0.028         |
| Örsjön             | 4.245                   | 0.465    | -12.021  | 3.109    | 1.176    | 1.446    | 12.949               | -0.040         |
| Brunnsjön          | 4.076                   | 0.524    | -11.975  | 3.097    | 0.648    | 1.621    | 6.001                | -0.030         |
| Stora Skärsjön     | 4.222                   | 0.459    | -11.876  | 3.085    | 1.147    | 1.416    | 13.681               | -0.044         |
| Gyltigesjön        |                         |          |          |          |          |          | 7.071                | -0.035         |
| Harasjön           | 4.012                   | 0.603    | -12.040  | 3.114    | 0.455    | 1.878    | 2.445                | -0.019         |
| Hjärtsjön          | 4.015                   | 0.918    | -11.794  | 3.067    | 0.520    | 2.815    | 6.209                | -0.018         |
| Fiolen             | 4.022                   | 0.755    | -12.147  | 3.132    | 0.449    | 2.365    | 4.362                | -0.018         |
| Gyslättasjön       | 4.380                   | 0.358    | -11.544  | 3.006    | 1.621    | 1.076    | 13.477               | -0.041         |
| Nässjön            | 4.141                   | 0.514    | -11.822  | 3.061    | 0.856    | 1.574    | 5.540                | -0.025         |
| Hagsjön            | 3.735                   | 0.879    | -12.231  | 3.150    | -0.467   | 2.769    | 3.877                | -0.018         |
| Hagasjön           | 4.053                   | 0.693    | -12.209  | 3.156    | 0.581    | 2.189    | 6.123                | -0.020         |
| Stengårdshultasjön | 4.007                   | 0.691    | -12.167  | 3.127    | 0.360    | 2.162    | 4.133                | -0.020         |
| Stora Härsjön      | 4.026                   | 0.736    | -12.342  | 3.173    | 0.433    | 2.336    | 5.048                | -0.020         |
| Allgjutten         | 4.098                   | 0.714    | -12.099  | 3.107    | 0.634    | 2.219    | 5.441                | -0.020         |
| Fräcksjön          | 4.126                   | 0.596    | -12.133  | 3.128    | 0.776    | 1.866    | 5.692                | -0.026         |
| Granvattnet        | 4.038                   | 0.613    | -12.106  | 3.152    | 0.624    | 1.932    | 5.186                | -0.024         |
| Geten              | 4.128                   | 0.477    | -12.138  | 3.135    | 0.800    | 1.496    | 9.747                | -0.039         |
| Skärgölen          |                         |          |          |          |          |          | 4.914                | -0.022         |
| Långsjön           | 3.996                   | 0.669    | -12.344  | 3.175    | 0.344    | 2.124    | 7.501                | -0.031         |
| Björken            | 4.061                   | 0.701    | -12.435  | 3.197    | 0.549    | 2.241    | 2.646                | -0.015         |
| Rotehogstjärnen    | 3.987                   | 0.601    | -12.190  | 3.141    | 0.334    | 1.889    | 6.488                | -0.031         |
| Ejgdesjön          | 4.244                   | 0.748    | -12.038  | 3.121    | 1.208    | 2.333    | 7.614                | -0.019         |
| Älgsjön            | 4.039                   | 0.624    | -12.097  | 3.128    | 0.537    | 1.952    | 4.272                | -0.023         |
| Stora Envättern    | 4.105                   | 0.627    | -12.297  | 3.165    | 0.693    | 1.984    | 4.874                | -0.022         |
| Västra Solsjön     | 3.989                   | 0.873    | -12.352  | 3.181    | 0.336    | 2.778    | 6.240                | -0.018         |
| Stensjön           | 3.885                   | 0.754    | -12.401  | 3.192    | -0.001   | 2.408    | 3.781                | -0.020         |
| Långsjön           | 4.018                   | 0.578    | -12.369  | 3.178    | 0.401    | 1.836    | 5.865                | -0.030         |
| Årsjön             | 4.249                   | 0.531    | -12.153  | 3.131    | 1.153    | 1.661    | 8.491                | -0.028         |
| Bysjön             |                         |          |          |          |          |          | 6.855                | -0.026         |
| Tärnan             | 4.097                   | 0.612    | -12.417  | 3.192    | 0.660    | 1.953    | 4.726                | -0.024         |
| Ulvsjön            | 4.120                   | 0.589    | -12.259  | 3.148    | 0.712    | 1.853    | 6.586                | -0.029         |
| Örvattnet          | 4.029                   | 0.572    | -12.130  | 3.128    | 0.475    | 1.788    | 6.153                | -0.030         |
| Lien               | 4.100                   | 0.744    | -12.341  | 3.164    | 0.629    | 2.355    | 6.495                | -0.021         |
| Övre Skärsjön      | 4.092                   | 0.552    | -11.997  | 3.088    | 0.642    | 1.706    | 4.554                | -0.025         |
| Dagarn             | 4.165                   | 0.641    | -12.422  | 3.180    | 0.822    | 2.038    | 5.669                | -0.022         |
| Västra Skälsjön    | 4.056                   | 0.775    | -12.312  | 3.155    | 0.484    | 2.445    | 9.152                | -0.027         |

|                     |       |       |         |       |        |       |       |        |
|---------------------|-------|-------|---------|-------|--------|-------|-------|--------|
| Skifsen             | 3.914 | 0.695 | -12.167 | 3.124 | 0.062  | 2.172 | 4.641 | -0.023 |
| Tryssjön            | 4.344 | 0.484 | -11.922 | 3.085 | 1.480  | 1.493 | 8.829 | -0.029 |
| Rädsjön             | 3.813 | 0.895 | -12.106 | 3.122 | -0.200 | 2.794 | 6.056 | -0.024 |
| Källsjön            | 3.958 | 0.589 | -12.193 | 3.148 | 0.268  | 1.856 | 4.764 | -0.028 |
| Stensjön            | 4.113 | 0.547 | -12.173 | 3.125 | 0.682  | 1.711 | 5.233 | -0.026 |
| Väster Rännöbodsjön | 3.944 | 0.641 | -12.364 | 3.176 | 0.164  | 2.035 | 4.170 | -0.026 |
| Stor-Backsjön       | 3.934 | 0.692 | -12.418 | 3.185 | 0.114  | 2.204 | 2.472 | -0.016 |
| Degervattnet        | 4.021 | 0.687 | -12.240 | 3.142 | 0.395  | 2.159 | 2.770 | -0.016 |
| Remmarsjön          | 3.944 | 0.672 | -12.368 | 3.171 | 0.138  | 2.131 | 3.699 | -0.021 |
| Bjänsjön            | 3.920 | 0.700 | -12.300 | 3.178 | 0.156  | 2.223 | 3.706 | -0.021 |
| Pahajärvi           | 4.013 | 0.612 | -12.220 | 3.132 | 0.349  | 1.917 | 4.540 | -0.024 |
| Jutsajaure          | 3.957 | 0.686 | -12.263 | 3.159 | 0.239  | 2.167 | 3.684 | -0.020 |

**Table S4** All models used in the model selection based on AICc, with explanatory variables T (mean temperature) and/or A (absorbance), excluding or including covariates D (mean depth) and P (total phosphorus). Bold are the best models ( $\Delta AICc < 2$ ) within each 4-model-set (T, A, T+A, T\*A; excluding [grey shaded] or including [white] covariates D and P), and their respective  $R^2$  and adjusted  $R^2$  values.

| Response variable                                    | Sign. in table 1 | Explanatory variables | Covariates   | AICc          | $\Delta AICc$ | $R^2$       | Adj $R^2$   |
|------------------------------------------------------|------------------|-----------------------|--------------|---------------|---------------|-------------|-------------|
| <b>Fish biomass productivity (LN)</b><br>Nlakes = 46 | T and A          |                       |              |               |               |             |             |
|                                                      |                  | T                     |              | 115.96        | 4.81          | 0.12        | 0.10        |
|                                                      |                  | A                     |              | 111.15        | 2.92          | 0.21        | 0.19        |
|                                                      |                  | <b>T + A</b>          |              | <b>108.23</b> | <b>0</b>      | <b>0.29</b> | <b>0.26</b> |
|                                                      |                  | T*A                   |              | 110.40        | 2.17          | 0.30        | 0.25        |
|                                                      |                  | T                     | D + P        | 115.14        | 7.94          | 0.22        | 0.17        |
|                                                      |                  | <b>A</b>              | <b>D + P</b> | <b>108.36</b> | <b>1.16</b>   | <b>0.33</b> | <b>0.28</b> |
|                                                      |                  | <b>T + A</b>          | <b>D + P</b> | <b>107.20</b> | <b>0</b>      | <b>0.38</b> | <b>0.32</b> |
|                                                      |                  | T*A                   | D + P        | 109.80        | 2.6           | 0.38        | 0.31        |
| <b>Population biomass (LN)</b><br>Nlakes = 52        | T                |                       |              |               |               |             |             |
|                                                      |                  | <b>T</b>              |              | <b>121.82</b> | <b>0.7</b>    | <b>0.11</b> | <b>0.10</b> |
|                                                      |                  | A                     |              | 124.78        | 3.66          | 0.06        | 0.04        |
|                                                      |                  | <b>T + A</b>          |              | <b>121.12</b> | <b>0</b>      | <b>0.16</b> | <b>0.13</b> |
|                                                      |                  | T*A                   |              | 123.53        | 2.41          | 0.16        | 0.11        |
|                                                      |                  | T                     | D + P        | 114.75        | 4.12          | 0.29        | 0.25        |
|                                                      |                  | A                     | D + P        | 112.95        | 2.32          | 0.32        | 0.28        |
|                                                      |                  | <b>T + A</b>          | <b>D + P</b> | <b>110.63</b> | <b>0</b>      | <b>0.38</b> | <b>0.33</b> |
|                                                      |                  | <b>T*A</b>            | <b>D + P</b> | <b>112.39</b> | <b>1.76</b>   | <b>0.39</b> | <b>0.32</b> |
| <b>Population abundance (LN)</b><br>Nlakes = 52      | T                |                       |              |               |               |             |             |
|                                                      |                  | <b>T</b>              |              | <b>113.74</b> | <b>0</b>      | <b>0.05</b> | <b>0.03</b> |
|                                                      |                  | <b>A</b>              |              | <b>114.96</b> | <b>1.22</b>   | <b>0.02</b> | <b>0.00</b> |
|                                                      |                  | <b>T + A</b>          |              | <b>115.05</b> | <b>1.31</b>   | <b>0.06</b> | <b>0.03</b> |



|                                                     |         |              |              |               |             |             |             |
|-----------------------------------------------------|---------|--------------|--------------|---------------|-------------|-------------|-------------|
|                                                     |         | T*A          |              | 117.10        | 3.36        | 0.07        | 0.01        |
|                                                     |         | T            | D + P        | 98.80         | 8.98        | 0.35        | 0.31        |
|                                                     |         | <b>A</b>     | <b>D + P</b> | <b>89.83</b>  | <b>0</b>    | <b>0.45</b> | <b>0.42</b> |
|                                                     |         | <b>T + A</b> | <b>D + P</b> | <b>90.67</b>  | <b>0.84</b> | <b>0.47</b> | <b>0.42</b> |
|                                                     |         | T*A          | D + P        | 93.18         | 3.35        | 0.47        | 0.41        |
| <b>Mean length (LN)</b><br>Nlakes = 49              | T       |              |              |               |             |             |             |
|                                                     |         | <b>T</b>     |              | <b>-47.79</b> | <b>0.82</b> | <b>0.16</b> | <b>0.15</b> |
|                                                     |         | A            |              | -40.96        | 7.65        | 0.04        | 0.02        |
|                                                     |         | <b>T + A</b> |              | <b>-46.89</b> | <b>1.72</b> | <b>0.19</b> | <b>0.15</b> |
|                                                     |         | <b>T*A</b>   |              | <b>-48.61</b> | <b>0</b>    | <b>0.26</b> | <b>0.21</b> |
|                                                     |         | <b>T</b>     | <b>D + P</b> | <b>-48.98</b> | <b>0</b>    | <b>0.26</b> | <b>0.21</b> |
|                                                     |         | A            | D + P        | -40.59        | 8.39        | 0.12        | 0.06        |
|                                                     |         | T + A        | D + P        | -46.53        | 2.45        | 0.26        | 0.20        |
|                                                     |         | T*A          | D + P        | -46.90        | 2.08        | 0.31        | 0.23        |
| <b>Skewness (positive) in length</b><br>Nlakes = 49 | T       |              |              |               |             |             |             |
|                                                     |         | <b>T</b>     |              | <b>114.00</b> | <b>0</b>    | <b>0.27</b> | <b>0.26</b> |
|                                                     |         | A            |              | 129.14        | 15.14       | 0.01        | -0.01       |
|                                                     |         | T + A        |              | 116.29        | 2.29        | 0.27        | 0.24        |
|                                                     |         | T*A          |              | 117.93        | 3.93        | 0.29        | 0.24        |
|                                                     |         | <b>T</b>     | <b>D + P</b> | <b>114.81</b> | <b>0</b>    | <b>0.33</b> | <b>0.28</b> |
|                                                     |         | A            | D + P        | 129.15        | 14.34       | 0.10        | 0.04        |
|                                                     |         | <b>T + A</b> | <b>D + P</b> | <b>115.88</b> | <b>1.07</b> | <b>0.35</b> | <b>0.29</b> |
|                                                     |         | T*A          | D + P        | 118.31        | 3.5         | 0.35        | 0.28        |
| <b>Mean predicted age (LN)</b><br>Nlakes = 46       | T and A |              |              |               |             |             |             |
|                                                     |         | T            |              | -12.72        | 2.92        | 0.22        | 0.20        |
|                                                     |         | A            |              | -3.58         | 12.06       | 0.04        | 0.02        |
|                                                     |         | <b>T + A</b> |              | <b>-14.64</b> | <b>1</b>    | <b>0.29</b> | <b>0.25</b> |
|                                                     |         | <b>T*A</b>   |              | <b>-15.64</b> | <b>0</b>    | <b>0.34</b> | <b>0.29</b> |
|                                                     |         | T            | D + P        | -8.64         | 2.55        | 0.23        | 0.18        |
|                                                     |         | A            | D + P        | -1.95         | 9.24        | 0.11        | 0.05        |
|                                                     |         | <b>T + A</b> | <b>D + P</b> | <b>-11.03</b> | <b>0.16</b> | <b>0.31</b> | <b>0.24</b> |
|                                                     |         | <b>T*A</b>   | <b>D + P</b> | <b>-11.19</b> | <b>0</b>    | <b>0.35</b> | <b>0.27</b> |
| <b>Skewness (positive) in age</b><br>Nlakes = 42    | T       |              |              |               |             |             |             |
|                                                     |         | <b>T</b>     |              | <b>123.33</b> | <b>0</b>    | <b>0.29</b> | <b>0.27</b> |
|                                                     |         | A            |              | 137.69        | 14.36       | 0.00        | -0.02       |
|                                                     |         | T + A        |              | 125.77        | 2.44        | 0.29        | 0.25        |
|                                                     |         | T*A          |              | 128.24        | 4.91        | 0.29        | 0.24        |
|                                                     |         | <b>T</b>     | <b>D + P</b> | <b>126.53</b> | <b>0</b>    | <b>0.32</b> | <b>0.27</b> |
|                                                     |         | A            | D + P        | 139.18        | 12.65       | 0.08        | 0.01        |
|                                                     |         | <b>T + A</b> | <b>D + P</b> | <b>127.77</b> | <b>1.24</b> | <b>0.34</b> | <b>0.27</b> |
|                                                     |         | T*A          | D + P        | 130.42        | 3.89        | 0.35        | 0.26        |
| <b>Length-at-age 1 (LN)</b><br>Nlakes = 49          | T and A |              |              |               |             |             |             |
|                                                     |         | T            |              | -80.46        | 5           | 0.07        | 0.05        |
|                                                     |         | A            |              | -82.95        | 2.51        | 0.12        | 0.10        |
|                                                     |         | <b>T + A</b> |              | <b>-85.46</b> | <b>0</b>    | <b>0.20</b> | <b>0.17</b> |
|                                                     |         | <b>T*A</b>   |              | <b>-84.83</b> | <b>0.63</b> | <b>0.23</b> | <b>0.18</b> |
|                                                     |         | <b>T</b>     | <b>D + P</b> | <b>-79.09</b> | <b>1.67</b> | <b>0.13</b> | <b>0.08</b> |
|                                                     |         | <b>A</b>     | <b>D + P</b> | <b>-78.82</b> | <b>1.94</b> | <b>0.13</b> | <b>0.07</b> |
|                                                     |         | <b>T + A</b> | <b>D + P</b> | <b>-80.76</b> | <b>0</b>    | <b>0.21</b> | <b>0.13</b> |

|                                                               |   | T*A          | D + P        | -79.64        | 1.12        | 0.24        | 0.14        |
|---------------------------------------------------------------|---|--------------|--------------|---------------|-------------|-------------|-------------|
| <b>Length-at-age 6 (LN)</b><br>Nlakes = 49                    | A |              |              |               |             |             |             |
|                                                               |   | T            |              | -14.01        | 23.36       | 0.00        | -0.02       |
|                                                               |   | <b>A</b>     |              | <b>-37.37</b> | <b>0</b>    | <b>0.39</b> | <b>0.37</b> |
|                                                               |   | T + A        |              | -35.04        | 2.33        | 0.39        | 0.36        |
|                                                               |   | T*A          |              | -33.09        | 4.28        | 0.39        | 0.35        |
|                                                               |   | T            | D + P        | -25.75        | 10.4        | 0.29        | 0.24        |
|                                                               |   | <b>A</b>     | <b>D + P</b> | <b>-36.15</b> | <b>0</b>    | <b>0.43</b> | <b>0.39</b> |
|                                                               |   | T + A        | D + P        | -33.55        | 2.6         | 0.43        | 0.38        |
|                                                               |   | T*A          | D + P        | -32.58        | 3.57        | 0.45        | 0.39        |
| <b>Length-specific-growth rate 170 mm (LN)</b><br>Nlakes = 49 | A |              |              |               |             |             |             |
|                                                               |   | T            |              | 129.05        | 6.16        | 0.02        | 0.00        |
|                                                               |   | <b>A</b>     |              | <b>122.89</b> | <b>0</b>    | <b>0.13</b> | <b>0.12</b> |
|                                                               |   | <b>T + A</b> |              | <b>124.62</b> | <b>1.73</b> | <b>0.15</b> | <b>0.11</b> |
|                                                               |   | T*A          |              | 127.09        | 4.2         | 0.15        | 0.09        |
|                                                               |   | T            | D + P        | 128.48        | 2.33        | 0.12        | 0.06        |
|                                                               |   | <b>A</b>     | <b>D + P</b> | <b>126.15</b> | <b>0</b>    | <b>0.16</b> | <b>0.11</b> |
|                                                               |   | <b>T + A</b> | <b>D + P</b> | <b>127.83</b> | <b>1.68</b> | <b>0.18</b> | <b>0.10</b> |
|                                                               |   | T*A          | D + P        | 130.54        | 4.39        | 0.18        | 0.08        |

**Table S5** All models used in the model selection based on AICc, with explanatory variables T (mean temperature) and/or A (absorbance), excluding or including the covariate roach population biomass (R). Bold are the best models ( $\Delta AICc < 2$ ) within each 4-model-set (T, A, T+A, T\*A; excluding [grey shaded] or including [white] the covariate R), and their respective R<sup>2</sup> and adjusted R<sup>2</sup> values.

| Response variable                                    | Sign. In table 1 | Explanatory variables | Covariates | AICc          | $\Delta AICc$ | R <sup>2</sup> | Adj R <sup>2</sup> |
|------------------------------------------------------|------------------|-----------------------|------------|---------------|---------------|----------------|--------------------|
| <b>Fish biomass productivity (LN)</b><br>Nlakes = 46 | T and A          |                       |            |               |               |                |                    |
|                                                      |                  | T                     |            | 115.96        | 4.81          | 0.12           | 0.1                |
|                                                      |                  | A                     |            | 111.15        | 2.92          | 0.21           | 0.19               |
|                                                      |                  | <b>T + A</b>          |            | <b>108.23</b> | <b>0</b>      | <b>0.29</b>    | <b>0.26</b>        |
|                                                      |                  | T*A                   |            | 110.40        | 2.17          | 0.30           | 0.25               |
|                                                      |                  | T                     | R          | 111.93        | 7.23          | 0.23           | 0.20               |
|                                                      |                  | A                     | R          | 108.75        | 4.05          | 0.28           | 0.25               |
|                                                      |                  | <b>T + A</b>          | <b>R</b>   | <b>104.70</b> | <b>0.00</b>   | <b>0.38</b>    | <b>0.34</b>        |
|                                                      |                  | T*A                   | R          | 107.04        | 2.34          | 0.38           | 0.32               |
| <b>Population biomass (LN)</b><br>Nlakes = 52        | T                |                       |            |               |               |                |                    |
|                                                      |                  | <b>T</b>              |            | <b>121.82</b> | <b>0.7</b>    | <b>0.11</b>    | <b>0.1</b>         |
|                                                      |                  | A                     |            | 124.78        | 3.66          | 0.06           | 0.04               |
|                                                      |                  | <b>T + A</b>          |            | <b>121.12</b> | <b>0</b>      | <b>0.16</b>    | <b>0.13</b>        |
|                                                      |                  | T*A                   |            | 123.53        | 2.41          | 0.16           | 0.11               |
|                                                      |                  | <b>T</b>              | <b>R</b>   | <b>114.84</b> | <b>0.00</b>   | <b>0.26</b>    | <b>0.23</b>        |
|                                                      |                  | A                     | R          | 120.66        | 5.82          | 0.17           | 0.14               |
|                                                      |                  | <b>T + A</b>          | <b>R</b>   | <b>115.44</b> | <b>0.60</b>   | <b>0.28</b>    | <b>0.24</b>        |
|                                                      |                  | T*A                   | R          | 117.86        | 3.02          | 0.29           | 0.23               |

|                                                     |         |              |          |               |             |             |             |
|-----------------------------------------------------|---------|--------------|----------|---------------|-------------|-------------|-------------|
| <b>Population abundance (LN)</b><br>Nlakes = 52     | T       |              |          |               |             |             |             |
|                                                     |         | <b>T</b>     |          | <b>113.74</b> | <b>0</b>    | <b>0.05</b> | <b>0.03</b> |
|                                                     |         | <b>A</b>     |          | <b>114.96</b> | <b>1.22</b> | <b>0.02</b> | <b>0</b>    |
|                                                     |         | <b>T + A</b> |          | <b>115.05</b> | <b>1.31</b> | <b>0.06</b> | <b>0.03</b> |
|                                                     |         | T*A          |          | 117.1         | 3.36        | 0.07        | 0.01        |
|                                                     |         | <b>T</b>     | <b>R</b> | <b>99.64</b>  | <b>0.00</b> | <b>0.30</b> | <b>0.28</b> |
|                                                     |         | A            | R        | 103.23        | 3.59        | 0.25        | 0.22        |
|                                                     |         | T + A        | R        | 101.91        | 2.27        | 0.31        | 0.26        |
|                                                     |         | T*A          | R        | 104.21        | 4.56        | 0.31        | 0.25        |
| <b>Mean length (LN)</b><br>Nlakes = 49              | T       |              |          |               |             |             |             |
|                                                     |         | <b>T</b>     |          | <b>-47.79</b> | <b>0.82</b> | <b>0.16</b> | <b>0.15</b> |
|                                                     |         | A            |          | -40.96        | 7.65        | 0.04        | 0.02        |
|                                                     |         | <b>T + A</b> |          | <b>-46.89</b> | <b>1.72</b> | <b>0.19</b> | <b>0.15</b> |
|                                                     |         | T*A          |          | -48.61        | 0           | 0.26        | 0.21        |
|                                                     |         | <b>T</b>     | <b>R</b> | <b>-46.17</b> | <b>0.89</b> | <b>0.18</b> | <b>0.14</b> |
|                                                     |         | A            | R        | -39.88        | 7.18        | 0.06        | 0.02        |
|                                                     |         | <b>T + A</b> | <b>R</b> | <b>-45.58</b> | <b>1.48</b> | <b>0.21</b> | <b>0.16</b> |
|                                                     |         | T*A          | R        | -47.06        | 0.00        | 0.27        | 0.21        |
| <b>Skewness (positive) in length</b><br>Nlakes = 49 | T       |              |          |               |             |             |             |
|                                                     |         | <b>T</b>     |          | <b>114.00</b> | <b>0</b>    | <b>0.27</b> | <b>0.26</b> |
|                                                     |         | A            |          | 129.14        | 15.14       | 0.01        | -0.01       |
|                                                     |         | T + A        |          | 116.29        | 2.29        | 0.27        | 0.24        |
|                                                     |         | T*A          |          | 117.93        | 3.93        | 0.29        | 0.24        |
|                                                     |         | <b>T</b>     | <b>R</b> | <b>115.40</b> | <b>0.00</b> | <b>0.29</b> | <b>0.25</b> |
|                                                     |         | A            | R        | 130.33        | 14.93       | 0.03        | -0.01       |
|                                                     |         | T + A        | R        | 117.68        | 2.28        | 0.29        | 0.24        |
|                                                     |         | T*A          | R        | 119.51        | 4.11        | 0.30        | 0.24        |
| <b>Mean predicted age (LN)</b><br>Nlakes = 46       | T and A |              |          |               |             |             |             |
|                                                     |         | T            |          | -12.72        | 2.92        | 0.22        | 0.2         |
|                                                     |         | A            |          | -3.58         | 12.06       | 0.04        | 0.02        |
|                                                     |         | <b>T + A</b> |          | <b>-14.64</b> | <b>1</b>    | <b>0.29</b> | <b>0.25</b> |
|                                                     |         | T*A          |          | -15.64        | 0           | 0.34        | 0.29        |
|                                                     |         | T            | R        | -10.81        | 3.33        | 0.23        | 0.19        |
|                                                     |         | A            | R        | -1.63         | 12.51       | 0.05        | 0.01        |
|                                                     |         | <b>T + A</b> | <b>R</b> | <b>-13.08</b> | <b>1.07</b> | <b>0.30</b> | <b>0.25</b> |
|                                                     |         | T*A          | R        | -14.15        | 0.00        | 0.36        | 0.29        |
| <b>Skewness (positive) in age</b><br>Nlakes = 42    | T       |              |          |               |             |             |             |
|                                                     |         | <b>T</b>     |          | <b>173.42</b> | <b>0</b>    | <b>0.29</b> | <b>0.27</b> |
|                                                     |         | A            |          | 180.56        | 14.36       | 0.00        | -0.02       |
|                                                     |         | T + A        |          | 175.40        | 2.44        | 0.29        | 0.25        |
|                                                     |         | T*A          |          | 177.80        | 4.91        | 0.29        | 0.24        |
|                                                     |         | <b>T</b>     | <b>R</b> | <b>82.58</b>  | <b>0.00</b> | <b>0.25</b> | <b>0.21</b> |
|                                                     |         | A            | R        | 92.46         | 9.87        | 0.05        | 0.00        |
|                                                     |         | T + A        | R        | 84.77         | 2.19        | 0.25        | 0.19        |
|                                                     |         | T*A          | R        | 87.27         | 4.69        | 0.26        | 0.18        |
| <b>Length-at-age 1 (LN)</b><br>Nlakes = 49          | T and A |              |          |               |             |             |             |
|                                                     |         | T            |          | -80.46        | 5           | 0.07        | 0.05        |
|                                                     |         | A            |          | -82.95        | 2.51        | 0.12        | 0.1         |

|                                                               |   |              |          |               |             |             |             |
|---------------------------------------------------------------|---|--------------|----------|---------------|-------------|-------------|-------------|
|                                                               |   | <b>T + A</b> |          | <b>-85.46</b> | <b>0</b>    | <b>0.20</b> | <b>0.17</b> |
|                                                               |   | <b>T*A</b>   |          | <b>-84.83</b> | <b>0.63</b> | <b>0.23</b> | <b>0.18</b> |
|                                                               |   | T            | R        | -80.38        | 7.34        | 0.11        | 0.07        |
|                                                               |   | A            | R        | -83.16        | 4.56        | 0.16        | 0.13        |
|                                                               |   | <b>T + A</b> | <b>R</b> | <b>-87.72</b> | <b>0.00</b> | <b>0.28</b> | <b>0.23</b> |
|                                                               |   | <b>T*A</b>   | <b>R</b> | <b>-86.41</b> | <b>1.31</b> | <b>0.30</b> | <b>0.23</b> |
| <b>Length-at-age 6 (LN)</b><br>Nlakes = 49                    | A |              |          |               |             |             |             |
|                                                               |   | T            |          | -14.01        | 23.36       | 0.00        | -0.02       |
|                                                               |   | <b>A</b>     |          | <b>-37.37</b> | <b>0</b>    | <b>0.39</b> | <b>0.37</b> |
|                                                               |   | T + A        |          | -35.04        | 2.33        | 0.39        | 0.36        |
|                                                               |   | T*A          |          | -33.09        | 4.28        | 0.39        | 0.35        |
|                                                               |   | T            | R        | -13.15        | 27.00       | 0.03        | -0.01       |
|                                                               |   | <b>A</b>     | <b>R</b> | <b>-40.14</b> | <b>0.00</b> | <b>0.45</b> | <b>0.42</b> |
|                                                               |   | T + A        | R        | -37.82        | 2.33        | 0.45        | 0.41        |
|                                                               |   | T*A          | R        | -35.92        | 4.23        | 0.46        | 0.41        |
| <b>Length-specific-growth rate 170 mm (LN)</b><br>Nlakes = 49 | A |              |          |               |             |             |             |
|                                                               |   | T            |          | 129.05        | 6.16        | 0.02        | 0           |
|                                                               |   | <b>A</b>     |          | <b>122.89</b> | <b>0</b>    | <b>0.13</b> | <b>0.12</b> |
|                                                               |   | <b>T + A</b> |          | <b>124.62</b> | <b>1.73</b> | <b>0.15</b> | <b>0.11</b> |
|                                                               |   | T*A          |          | 127.09        | 4.2         | 0.15        | 0.09        |
|                                                               |   | T            | R        | 131.23        | 6.76        | 0.02        | -0.02       |
|                                                               |   | <b>A</b>     | <b>R</b> | <b>124.46</b> | <b>0.00</b> | <b>0.15</b> | <b>0.11</b> |
|                                                               |   | <b>T + A</b> | <b>R</b> | <b>126.36</b> | <b>1.90</b> | <b>0.16</b> | <b>0.10</b> |
|                                                               |   | T*A          | R        | 128.95        | 4.49        | 0.16        | 0.08        |
